# Supplementary material for: Lithium metal atoms fill vacancies in the germanium network of a type-I clathrate: synthesis and structural characterization of Ba8Li5Ge41
Source: Royal Society of Chemistry journal article supplement (doi:10.1039/d3dt01168b), 2023-01-01
Supplement: d3dt01168b1.pdf [file d3dt01168b1.pdf]

## SUPPORTING INFORMATION

# Lithium metal atoms fill vacancies in the germanium network of a type-I clathrate: Synthesis and structural characterization of $\text{Ba}_8\text{Li}_5\text{Ge}_{41}$

*Kowsik Ghosh<sup>1</sup>, Alexander Ovchinnikov<sup>1,2</sup>, Michael Baitinger<sup>3</sup>, Mitja Krnel<sup>3</sup>, Ulrich Burkhardt<sup>3</sup>, Yuri Grin<sup>3</sup>, and Svilen Bobev<sup>1\*</sup>*

<sup>1</sup> Department of Chemistry and Biochemistry, University of Delaware, Newark, Delaware 19716, United States.

<sup>2</sup> Faculty of Chemistry and Food Chemistry, Technische Universität Dresden, 01062 Dresden, Germany.

<sup>3</sup> Max Plank Institut für Chemische Physik fester Stoffe, 01187 Dresden, Germany.

## Table of Contents

### Additional crystallographic details

1. Table S1. Selected crystallographic data for  $\text{Ba}_8\text{Li}_5\text{Ge}_{41}$  synthesized by *B* synthesis method;  $T = 200(2)$  K; Mo  $K\alpha$ ,  $\lambda = 0.71073$  Å; space group  $Pm\bar{3}n$ ,  $Z = 1$ .
2. Table S2. Selected data crystallographic data for  $\text{Ba}_8\text{Li}_5\text{Ge}_{41}$  synthesized by *C* synthesis method;  $T = 200(2)$  K; Mo  $K\alpha$ ,  $\lambda = 0.71073$  Å; space group  $Pm\bar{3}n$ ,  $Z = 1$ .
3. Table S3. Selected crystallographic data for  $\text{Ba}_8\text{Li}_5\text{Ge}_{41}$  synthesized by *A* synthesis method with doubly-reduced amount of Li in the nominal composition;  $T = 200(2)$  K; Mo  $K\alpha$ ,  $\lambda = 0.71073$  Å; space group  $Pm\bar{3}n$ ,  $Z = 1$ .
4. Table S4. Refined atomic coordinates and equivalent isotropic displacement parameters ( $U_{\text{eq}}^{\text{a}}$ ) for  $\text{Ba}_8\text{Li}_5\text{Ge}_{41}$  synthesized by *B* synthesis method.
5. Table S5. Refined atomic coordinates and equivalent isotropic displacement parameters ( $U_{\text{eq}}^{\text{a}}$ ) for  $\text{Ba}_8\text{Li}_5\text{Ge}_{41}$  synthesized by *B* synthesis method.
6. Table S6. Refined atomic coordinates and equivalent isotropic displacement parameters ( $U_{\text{eq}}^{\text{a}}$ ) for  $\text{Ba}_8\text{Li}_5\text{Ge}_{41}$  synthesized by *A* synthesis method with doubly-reduced amount of Li in the nominal composition.
7. Figure S1. Powder X-ray diffraction pattern of  $\text{Ba}_8\text{Li}_5\text{Ge}_{41}$  and the same after 6 weeks being exposed to the ambient atmosphere.

### Additional characterization

1. Figure S2. Scanning Electron Microscopy (SEM) image and atomic percentages measured by the X-ray energy-dispersive method for crystals of  $\text{Ba}_8\text{Li}_5\text{Ge}_{41}$  (sample from method *A*).
2. Figure S3. Scanning Electron Microscopy (SEM) image of the cross-section of a  $\text{Ba}_8\text{Li}_5\text{Ge}_{41}$  crystal (sample from method *A*).
3. Figure S4. Electrical resistivity of a single-crystal of the  $\text{Ba}_8\text{Li}_5\text{Ge}_{41}$  clathrate (*A* synthesis method) in the temperature range 2–300 K.

Table S1. Selected crystallographic data for Ba<sub>8</sub>Li<sub>5</sub>Ge<sub>41</sub> synthesized by *B* synthesis method; *T* = 200(2) K; Mo K $\alpha$ ,  $\lambda$  = 0.71073 Å; space group  $Pm\bar{3}n$ , *Z* = 1. CCDC no. 2257290.

|                                                                           |                                                         |
|---------------------------------------------------------------------------|---------------------------------------------------------|
| Chemical formula                                                          | Ba <sub>8</sub> Li <sub>5.1(1)</sub> Ge <sub>40.9</sub> |
| <i>a</i> / Å                                                              | 10.8048(11)                                             |
| <i>V</i> / Å <sup>3</sup>                                                 | 1261.39(13)                                             |
| $\rho_{\text{calc.}}$ / g cm <sup>-3</sup>                                | 5.40                                                    |
| $\mu(\text{Mo-K}\alpha)$ / cm <sup>-1</sup>                               | 300.5                                                   |
| <i>R</i> <sub>1</sub> ( <i>I</i> > 2 $\sigma$ ( <i>I</i> )) <sup>a</sup>  | 0.0292                                                  |
| <i>wR</i> <sub>2</sub> ( <i>I</i> > 2 $\sigma$ ( <i>I</i> )) <sup>a</sup> | 0.0680                                                  |
| <i>R</i> <sub>1</sub> (all data) <sup>a</sup>                             | 0.0354                                                  |
| <i>wR</i> <sub>2</sub> (all data) <sup>a</sup>                            | 0.0698                                                  |
| $\Delta\rho_{\text{max,min}}$ / e <sup>-</sup> · Å <sup>-3</sup>          | 1.12, -1.21                                             |

<sup>a</sup>  $R_1 = \sum ||F_o| - |F_c| / \sum |F_o|$ ;  $wR_2 = [\sum [w(F_o^2 - F_c^2)^2] / \sum [w(F_o^2)^2]]^{1/2}$ ,  
where  $w = 1 / [\sigma^2 F_o^2 + (0.0360 \cdot P)^2 + (3.264 \cdot P)]$ , and  $P = (F_o^2 + 2F_c^2) / 3$

Table S2. Selected crystallographic data for Ba<sub>8</sub>Li<sub>5</sub>Ge<sub>41</sub> synthesized by *C* synthesis method; *T* = 200(2) K; Mo K $\alpha$ ,  $\lambda$  = 0.71073 Å; space group  $Pm\bar{3}n$ , *Z* = 1. CCDC no. 2257291.

|                                                                 |                                                         |
|-----------------------------------------------------------------|---------------------------------------------------------|
| Chemical formula                                                | Ba <sub>8</sub> Li <sub>5.1(1)</sub> Ge <sub>40.9</sub> |
| <i>a</i> /Å                                                     | 10.8098(12)                                             |
| <i>V</i> /Å <sup>3</sup>                                        | 1263.14(14)                                             |
| $\rho_{\text{calc.}}$ /g cm <sup>-3</sup>                       | 5.40                                                    |
| $\mu(\text{Mo-K}\alpha)$ /cm <sup>-1</sup>                      | 300.1                                                   |
| $R_1 (I > 2\sigma(I))^{\text{a}}$                               | 0.0223                                                  |
| $wR_2 (I > 2\sigma(I))^{\text{a}}$                              | 0.0444                                                  |
| $R_1$ (all data) <sup>a</sup>                                   | 0.0269                                                  |
| $wR_2$ (all data) <sup>a</sup>                                  | 0.0455                                                  |
| $\Delta\rho_{\text{max,min}}$ / e <sup>-</sup> ·Å <sup>-3</sup> | 0.85, -0.72                                             |

<sup>a</sup>  $R_1 = \sum ||F_o| - |F_c|| / \sum |F_o|$ ;  $wR_2 = [\sum [w(F_o^2 - F_c^2)^2] / \sum [w(F_o^2)^2]]^{1/2}$ ,  
where  $w = 1 / [\sigma^2 F_o^2 + (0.0155 \cdot P)^2 + (6.60 \cdot P)]$ , and  $P = (F_o^2 + 2F_c^2) / 3$ .

Table S3. Selected crystallographic data for Ba<sub>8</sub>Li<sub>5</sub>Ge<sub>41</sub> synthesized by *A* synthesis method with doubly-reduced amount of Li in the nominal composition; *T* = 200(2) K; Mo K $\alpha$ ,  $\lambda$  = 0.71073 Å; space group  $Pm\bar{3}n$ , *Z* = 1. CCDC no. 2257292.

|                                                                  |                                                         |
|------------------------------------------------------------------|---------------------------------------------------------|
| Chemical formula                                                 | Ba <sub>8</sub> Li <sub>5.1(1)</sub> Ge <sub>40.9</sub> |
| <i>a</i> / Å                                                     | 10.8090(7)                                              |
| <i>V</i> / Å <sup>3</sup>                                        | 1262.86(14)                                             |
| $\rho_{\text{calc.}}$ / g cm <sup>-3</sup>                       | 5.40                                                    |
| $\mu(\text{Mo-K}\alpha)$ / cm <sup>-1</sup>                      | 300.7                                                   |
| $R_1 (I > 2\sigma(I))^{\text{a}}$                                | 0.0321                                                  |
| $wR_2 (I > 2\sigma(I))^{\text{a}}$                               | 0.0646                                                  |
| $R_1$ (all data) <sup>a</sup>                                    | 0.0451                                                  |
| $wR_2$ (all data) <sup>a</sup>                                   | 0.0694                                                  |
| $\Delta\rho_{\text{max,min}}$ / e <sup>-</sup> · Å <sup>-3</sup> | 1.84, -1.40                                             |

<sup>a</sup>  $R_1 = \sum ||F_o| - |F_c|| / \sum |F_o|$ ;  $wR_2 = [\sum [w(F_o^2 - F_c^2)^2] / \sum [w(F_o^2)^2]]^{1/2}$ ,  
where  $w = 1 / [\sigma^2 F_o^2 + (0.0201 \cdot P)^2 + (18.213 \cdot P)]$ , and  $P = (F_o^2 + 2F_c^2) / 3$ ;

Table S4. Refined atomic coordinates and equivalent isotropic displacement parameters ( $U_{eq}^a$ ) for  $Ba_8Li_5Ge_{41}$  synthesized by *B* synthesis method.

| <i>Atom</i>      | <i>Wyckoff Site</i> | <i>Occupancy /%</i> | <i>x</i>   | <i>y</i>   | <i>z</i> | $U_{eq} / \text{\AA}^2$ |
|------------------|---------------------|---------------------|------------|------------|----------|-------------------------|
| Ba1              | 2 <i>a</i>          | 100                 | 0          | 0          | 0        | 0.0099(3)               |
| Ba2 <sup>b</sup> | 6 <i>d</i>          | 100                 | 0          | ½          | ¼        | 0.0364(3)               |
| Li/Ge1           | 6 <i>c</i>          | 84.5(7)/15.5(7)     | ¼          | ½          | 0        | 0.007(2)                |
| Ge2              | 16 <i>i</i>         | 100                 | 0.18312(4) | <i>x</i>   | <i>x</i> | 0.0112(2)               |
| Ge3              | 24 <i>k</i>         | 100                 | 0.11636(6) | 0.31002(7) | 0        | 0.0138(2)               |

<sup>a</sup>  $U_{eq}$  is defined as one third of the trace of the orthogonalized  $U_{ij}$  tensor.

<sup>b</sup> Ba2 can also be refined as off-centered at the 48*l* site (1/8 occupancy) with coordinates 0.011(1) 0.05127(9) 0.243(2)  $U_{eq} = 0.022(3)$

Table S5. Refined atomic coordinates and equivalent isotropic displacement parameters ( $U_{eq}^a$ ) for  $Ba_8Li_5Ge_{41}$  synthesized by *C* synthesis method.

| <i>Atom</i>      | <i>Wyckoff Site</i> | <i>Occupancy /%</i> | <i>x</i>   | <i>y</i>   | <i>z</i> | $U_{eq} / \text{\AA}^2$ |
|------------------|---------------------|---------------------|------------|------------|----------|-------------------------|
| Ba1              | 2 <i>a</i>          | 100                 | 0          | 0          | 0        | 0.0087(2)               |
| Ba2 <sup>b</sup> | 6 <i>d</i>          | 100                 | 0          | ½          | ¼        | 0.0354(2)               |
| Li/Ge1           | 6 <i>c</i>          | 84.6(9)/15.4(9)     | ¼          | ½          | 0        | 0.009(2)                |
| Ge2              | 16 <i>i</i>         | 100                 | 0.18305(3) | <i>x</i>   | <i>x</i> | 0.010(2)                |
| Ge3              | 24 <i>k</i>         | 100                 | 0.11607(5) | 0.30970(5) | 0        | 0.011(2)                |

<sup>a</sup>  $U_{eq}$  is defined as one third of the trace of the orthogonalized  $U_{ij}$  tensor.

<sup>b</sup> Ba2 can also be refined as off-centered at the 48*l* site (1/8 occupancy) with coordinates 0.016(3) 0.0506(1) 0.252(2)  $U_{eq} = 0.029(1)$

Table S6. Refined atomic coordinates and equivalent isotropic displacement parameters ( $U_{eq}^a$ ) for  $Ba_8Li_5Ge_41$  synthesized by *A* synthesis method with doubly-reduced amount of Li in the nominal composition.

| <i>Atom</i>      | <i>Wyckoff Site</i> | <i>Occupancy /%</i> | <i>x</i>   | <i>y</i>   | <i>z</i> | $U_{eq}/\text{\AA}^2$ |
|------------------|---------------------|---------------------|------------|------------|----------|-----------------------|
| Ba1              | <i>2a</i>           | 100                 | 0          | 0          | 0        | 0.0083(3)             |
| Ba2 <sup>b</sup> | <i>6d</i>           | 100                 | 0          | 1/2        | 1/4      | 0.0384(4)             |
| Li/Ge1           | <i>6c</i>           | 83(1)/17(1)         | 1/4        | 1/2        | 0        | 0.009(2)              |
| Ge2              | <i>16i</i>          | 100                 | 0.18318(5) | <i>x</i>   | <i>x</i> | 0.0108(3)             |
| Ge3              | <i>24k</i>          | 100                 | 0.11652(8) | 0.31035(9) | 0        | 0.0138(3)             |

<sup>a</sup>  $U_{eq}$  is defined as one third of the trace of the orthogonalized  $U_{ij}$  tensor.

<sup>b</sup> Ba2 can also be refined as off-centered at the *48l* site (1/8 occupancy) with coordinates 0.0143(8) 0.0512(1) 0.241(2)  $U_{eq} = 0.021(3)$

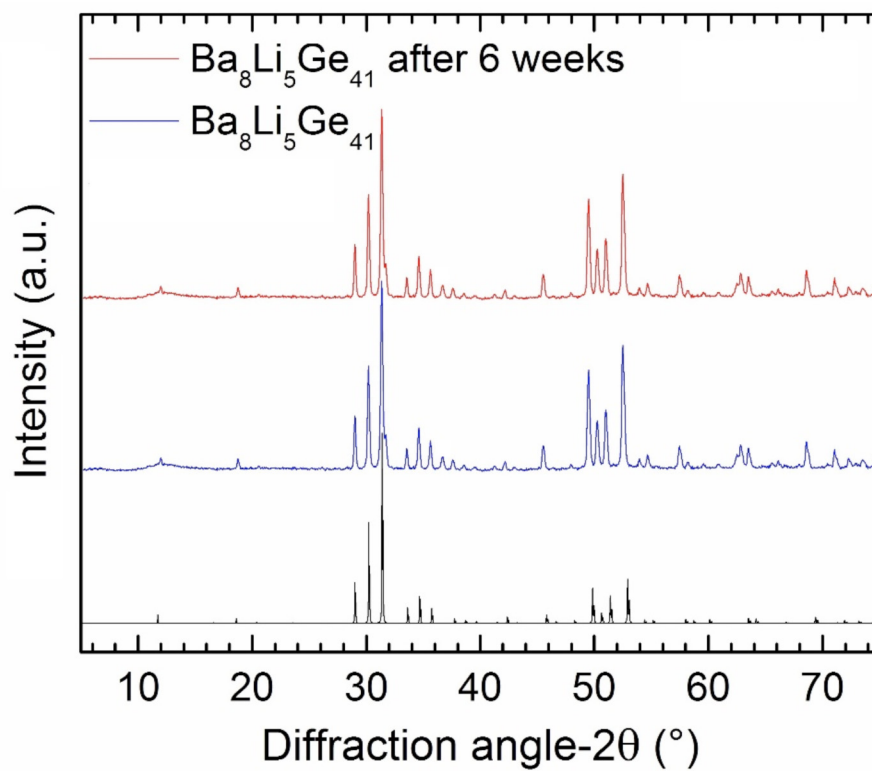

Figure S1. Powder X-ray diffraction pattern of  $\text{Ba}_8\text{Li}_5\text{Ge}_{41}$  and the same after 6 weeks being exposed to the ambient atmosphere. For comparison, the simulated pattern of  $\text{Ba}_8\text{Li}_5\text{Ge}_{41}$  is also provided (black trace).



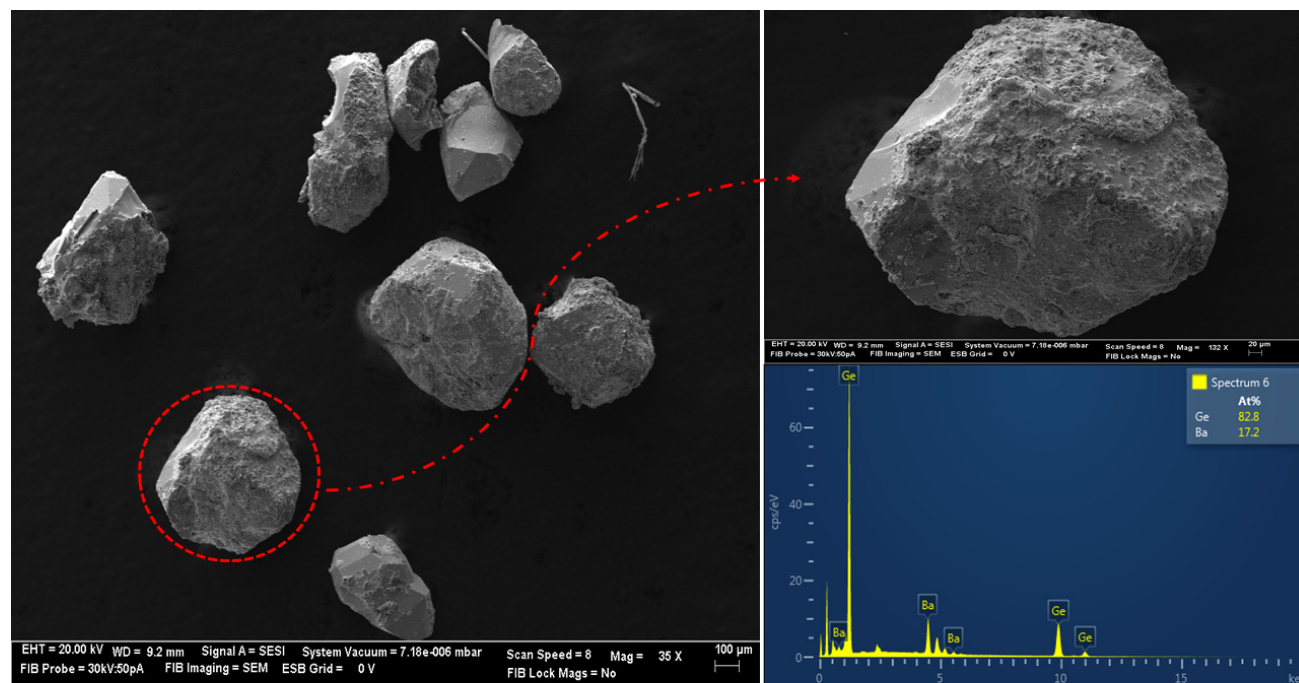

Figure S2. Scanning Electron Microscopy (SEM) image and atomic percentages measured by the X-ray energy-dispersive method for crystals of  $\text{Ba}_8\text{Li}_5\text{Ge}_{41}$  (sample from method *A*).

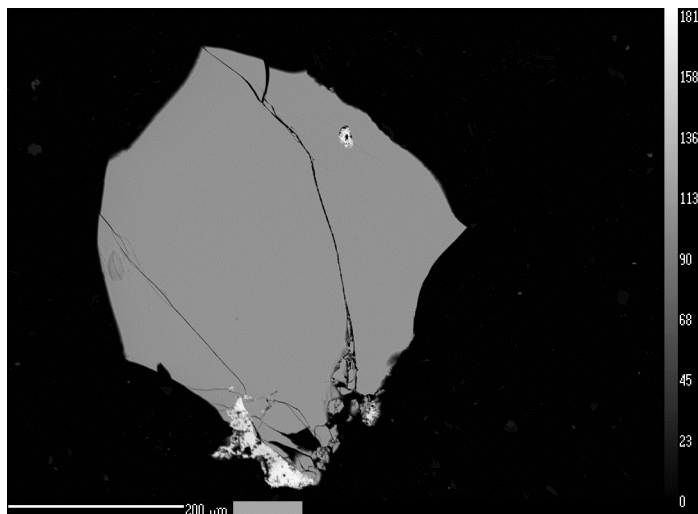

Figure S3. Scanning Electron Microscopy (SEM) image of the cross-section of a Ba<sub>8</sub>Li<sub>5</sub>Ge<sub>41</sub> crystal (sample from method *A*).

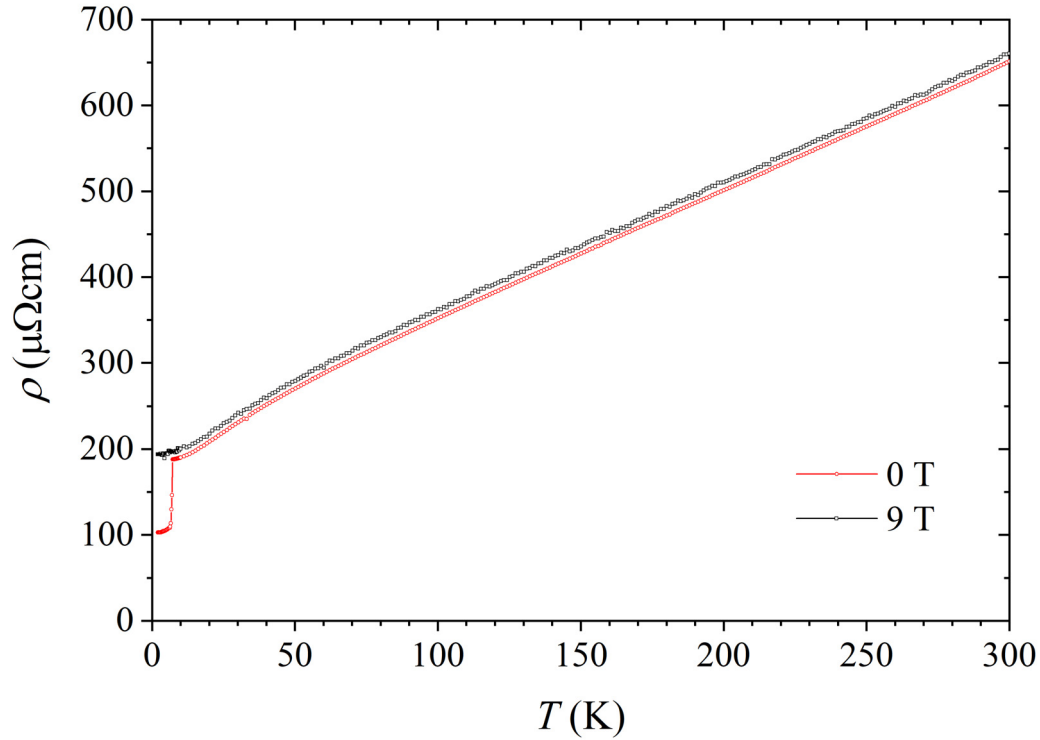

Figure S4. Electrical resistivity of a single-crystal of the  $\text{Ba}_8\text{Li}_5\text{Ge}_{41}$  clathrate ( $A$  synthesis method) in the temperature range 2–300 K.

Away from the low-temperature limit, the  $\rho(T)$  increases linearly with temperature, like in standard metals. The positive temperature coefficient in  $\rho(T)$  demonstrates the dominant role of the electron-phonon inelastic scattering mechanism. In zero magnetic field, a sudden drop of resistivity is observed at  $T = 7.2$  K, which can be attributed to superconducting (SC) transition of Pb. Pb is a starting material (flux) present in the synthesis of  $\text{Ba}_8\text{Li}_5\text{Ge}_{41}$  and thus an impurity that cannot be avoided. Since the Pb to sample volume ratio is small,  $\rho(T)$  does not drop to zero. In  $\mu_0 H = 9$  T field  $\rho(T)$  shows a saturation to a constant plateau in the  $T \rightarrow 0$  limit due to scattering of electrons on quenched defects in the structure in the normal state. The SC transition

is suppressed in  $\mu_0 H = 9$  T field and the difference between  $\mu_0 H = 0$  T and 9 T resistivity values at  $T = 300$  K is within the experimental error of a few %. According to the high resistivity values at  $T = 2$  K ( $\rho_{2K} \approx 190 \mu\Omega \text{ cm}$ ) and 300 K ( $\rho_{300K} \approx 650 \mu\Omega \text{ cm}$ ) this material can be considered as a bad metal and a moderate electrical conductor.
